# Supplementary material for: Human fibroblast and stem cell resource from the Dominantly Inherited Alzheimer Network
Source: Springer Nature journal article supplement (doi:10.1186/s13195-018-0400-0), 2018-07-25
Supplement: MOESM1 [file 15978318]

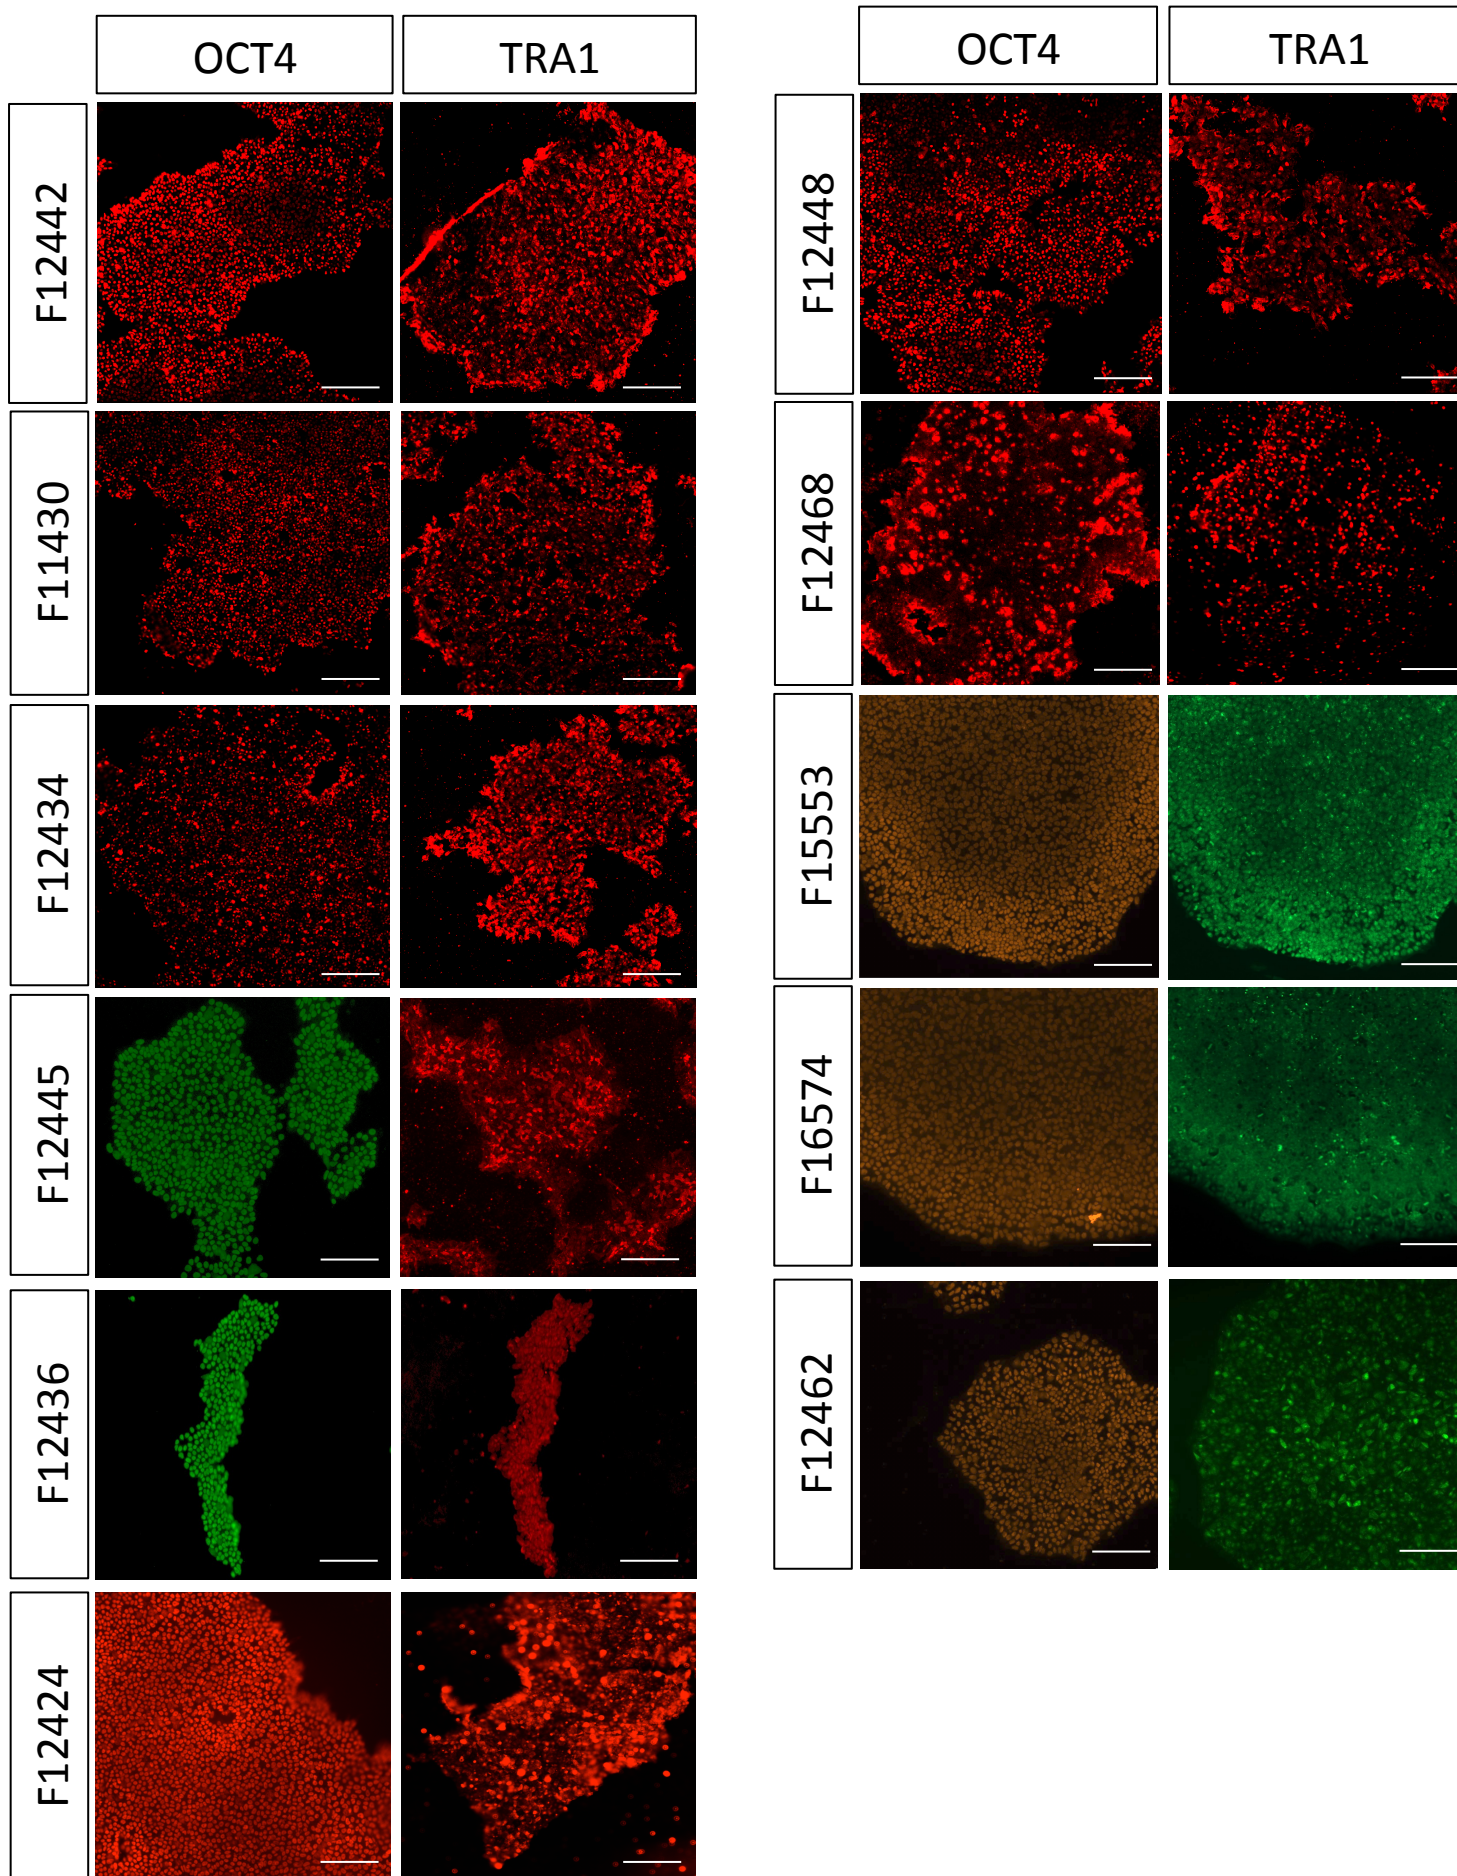

**Supplemental Figure 1: Immunostaining of DIAN iPSC for pluripotency markers.** iPSCs included in the collection were fixed and stained with antibodies to OCT4 and TRA1. Scale bar represents 100 $\mu$ M.

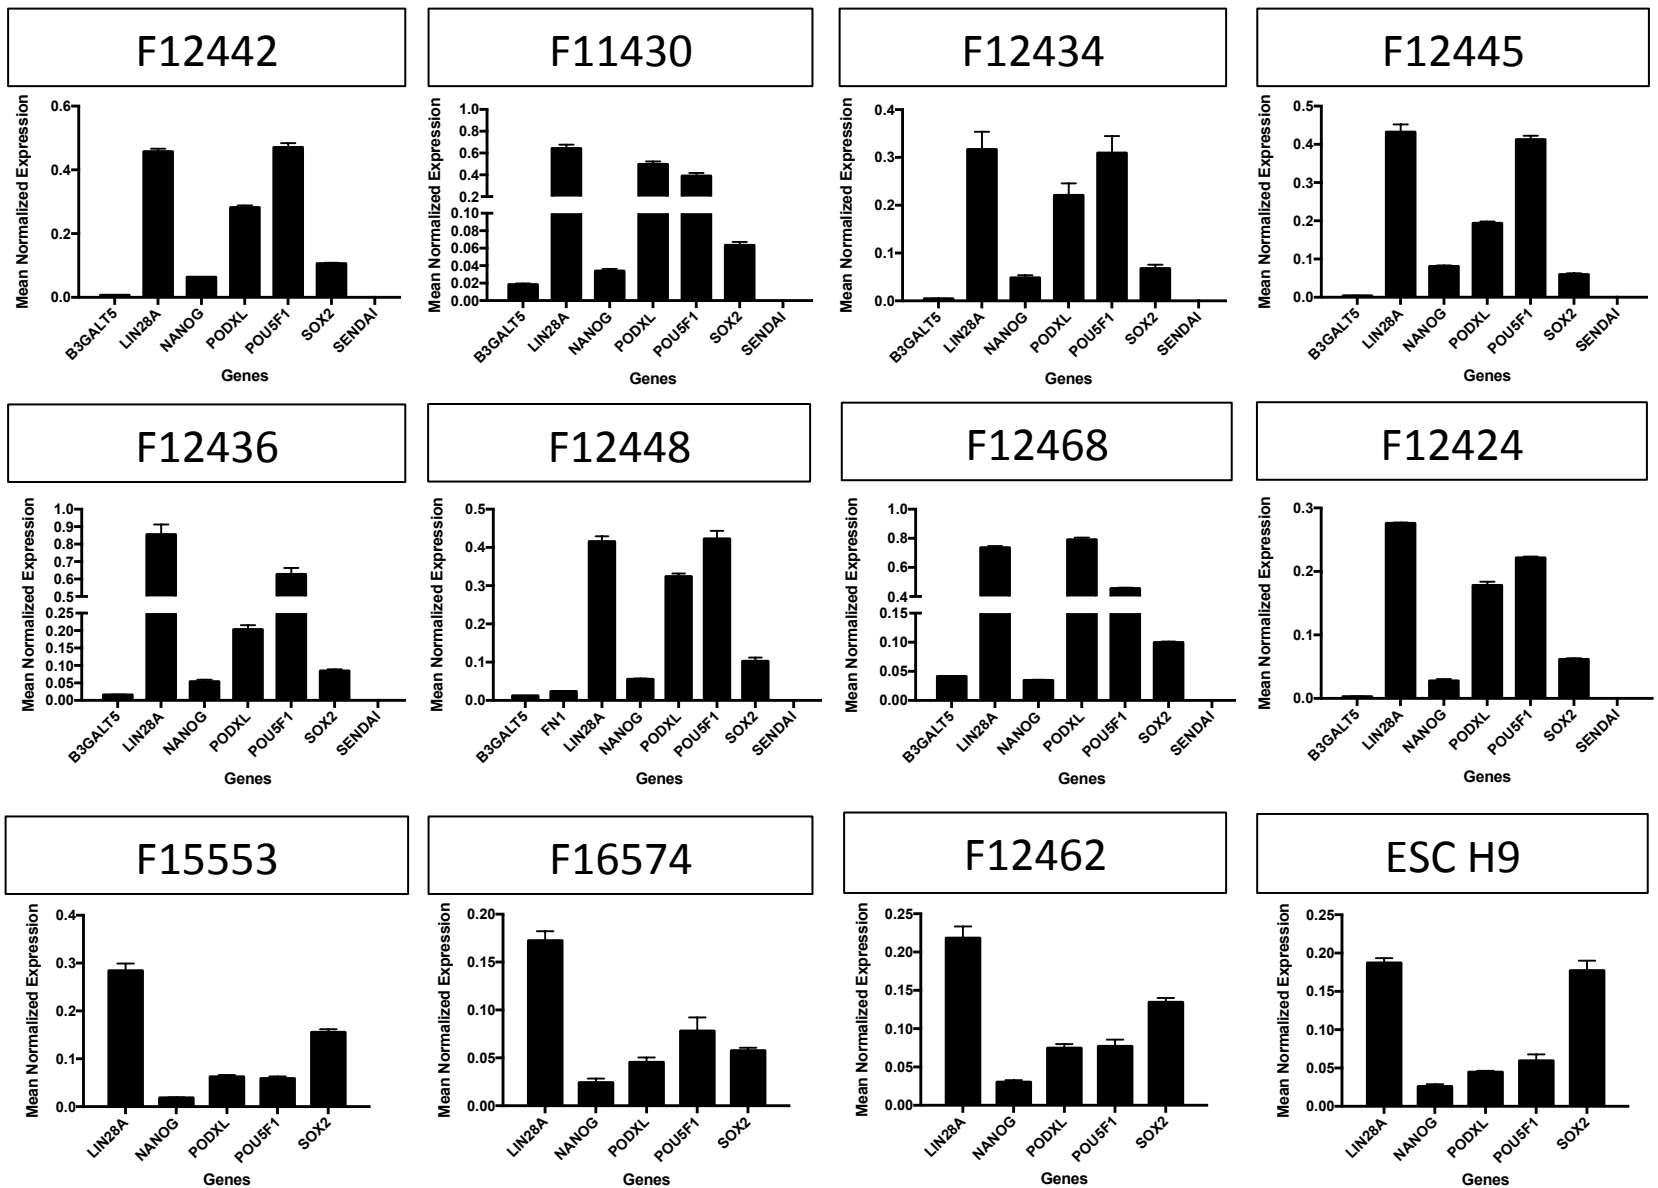

**Supplemental Figure 2: Quantitative assessment of pluripotent markers in DIAN iPSC.** iPSC lines were analyzed by qPCR (Taqman assay) to determine expression of pluripotency markers and, in lines reprogrammed with Sendai virus, the absence of Sendai virus. Human embryonic stem cell (H9) were included as a positive control. Genes expressed relative to a housekeeping gene, *GAPDH*. Graphs represent mean normalized expressed  $\pm$  SEM.

F12442

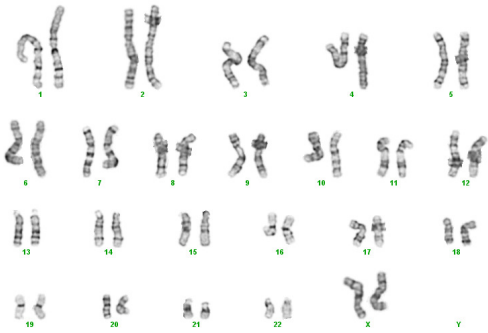

F11430

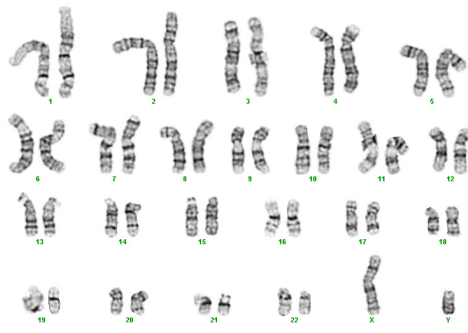

F12434

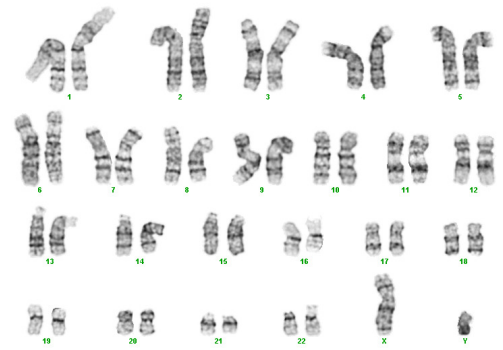

F12445

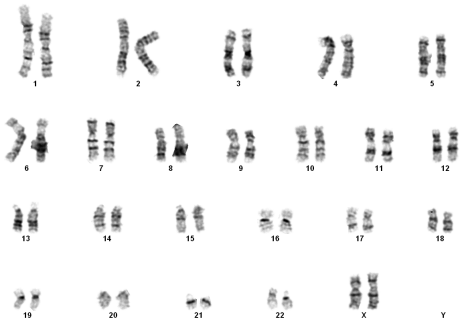

F12436

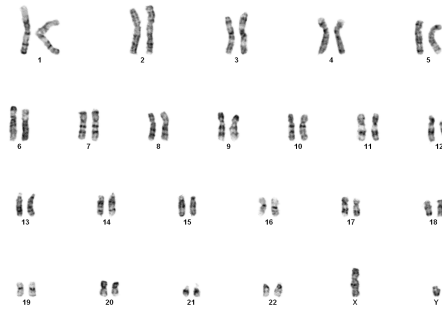

F12424

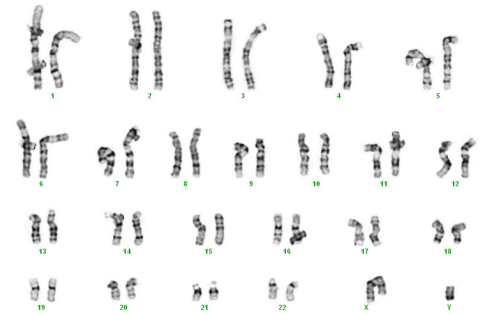

F12448

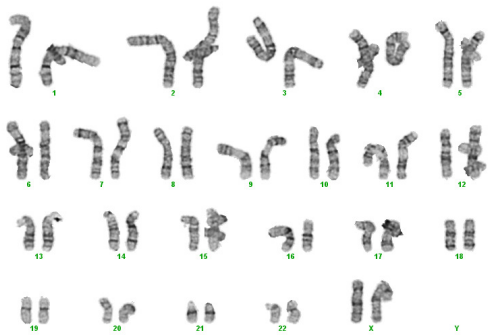

F12468

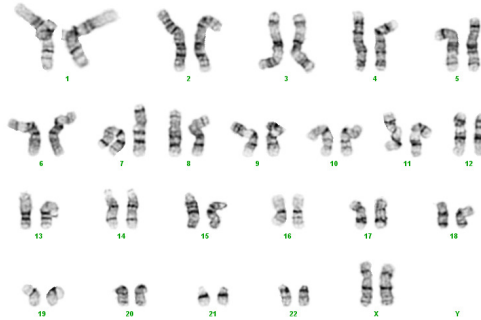

**Supplemental Figure 3: Karyotypes of DIAN iPSCs.** G-banded karyotyping of iPSC exhibit no chromosomal abnormalities in the clones represented in the collection.
