# Supplementary material for: Human fibroblast and stem cell resource from the Dominantly Inherited Alzheimer Network
Source: Springer Nature journal article supplement (doi:10.1186/s13195-018-0400-0), 2018-07-25
Supplement: MOESM2 [file 15978318]

# F15553

**A**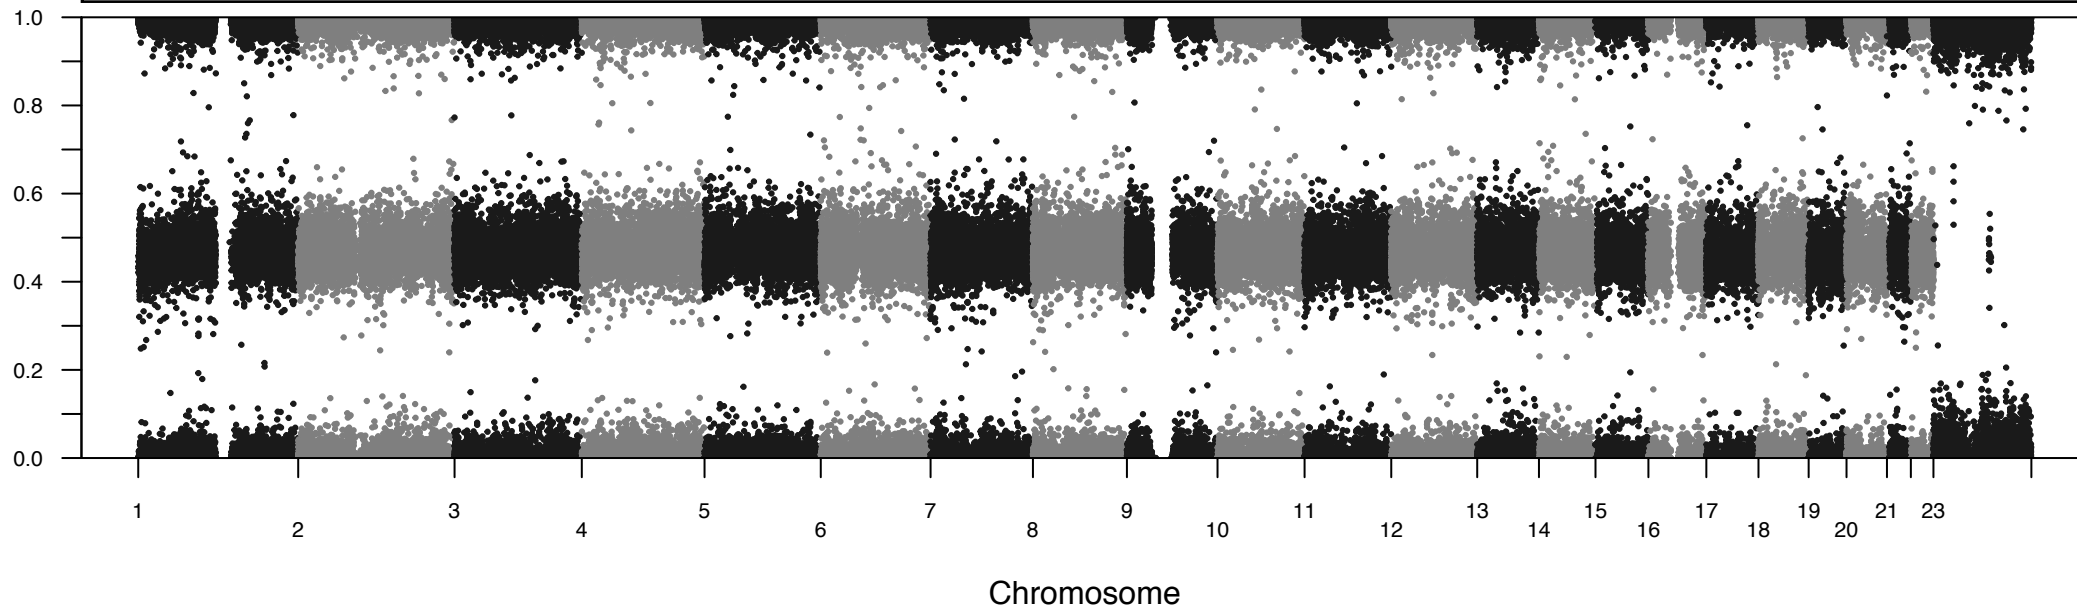**B**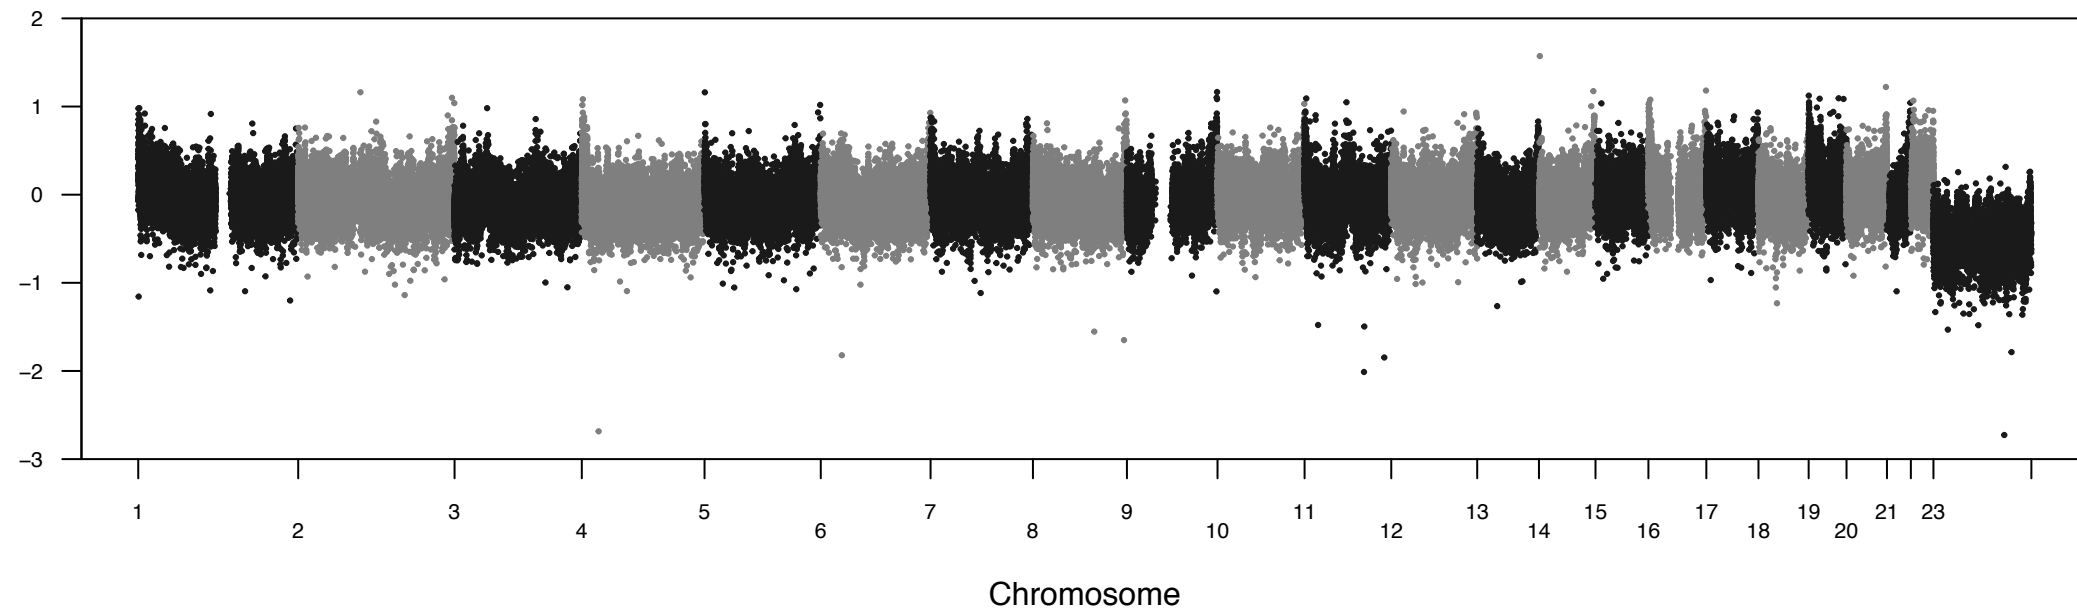

F16574

C

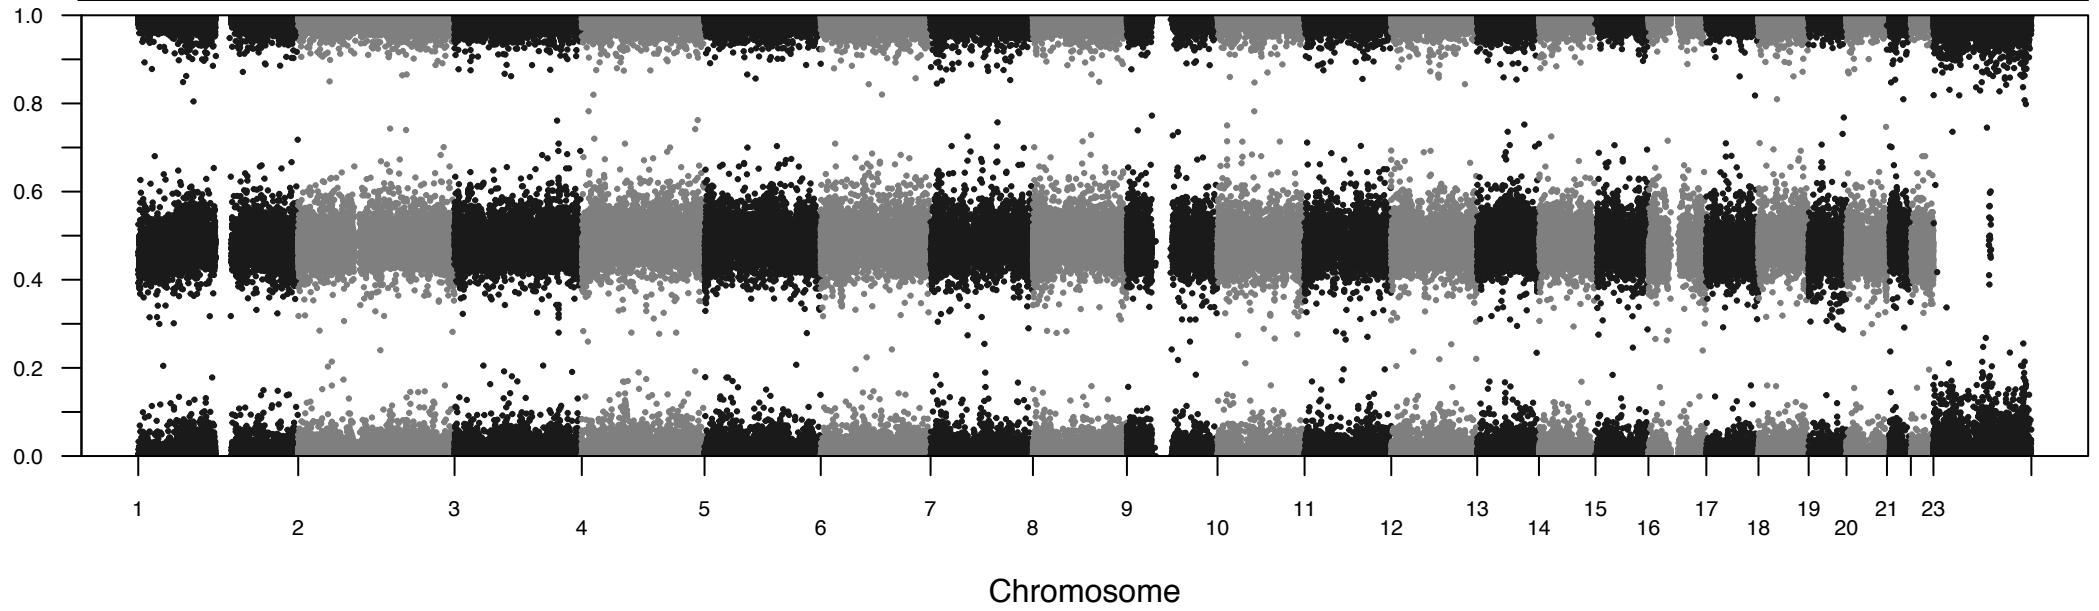

D

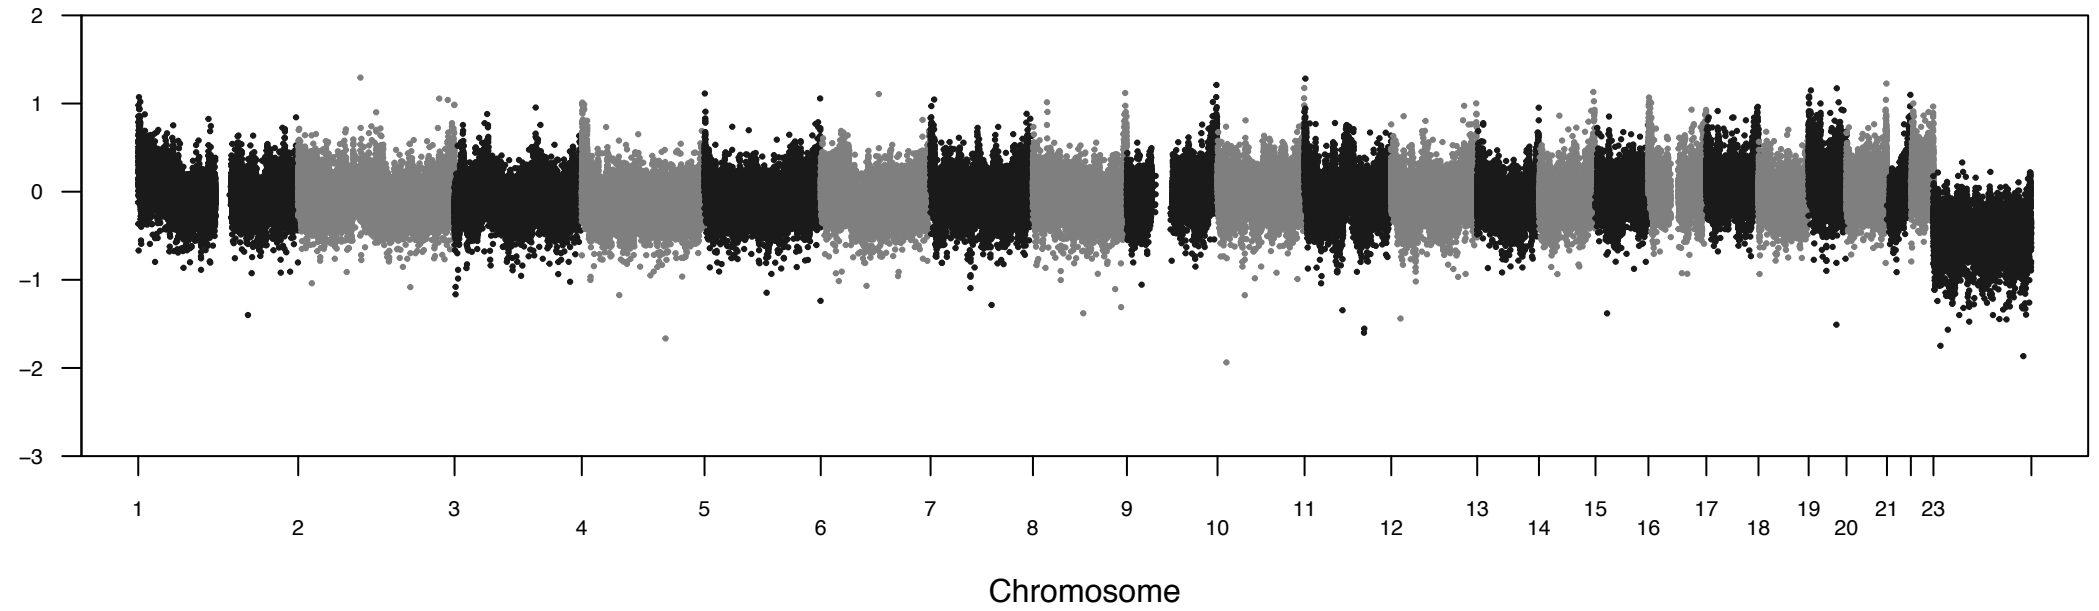



F12462

Π

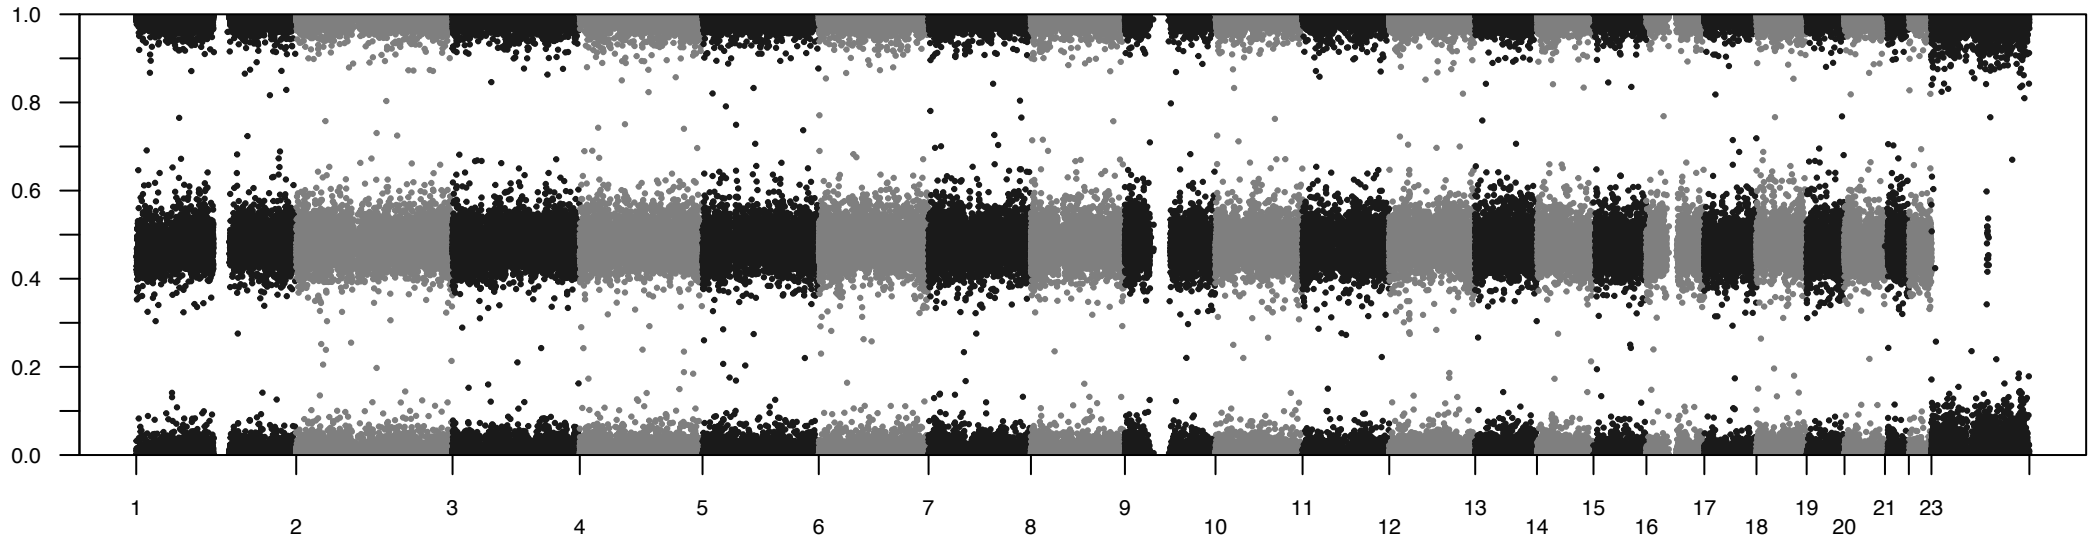

Chromosome

Π

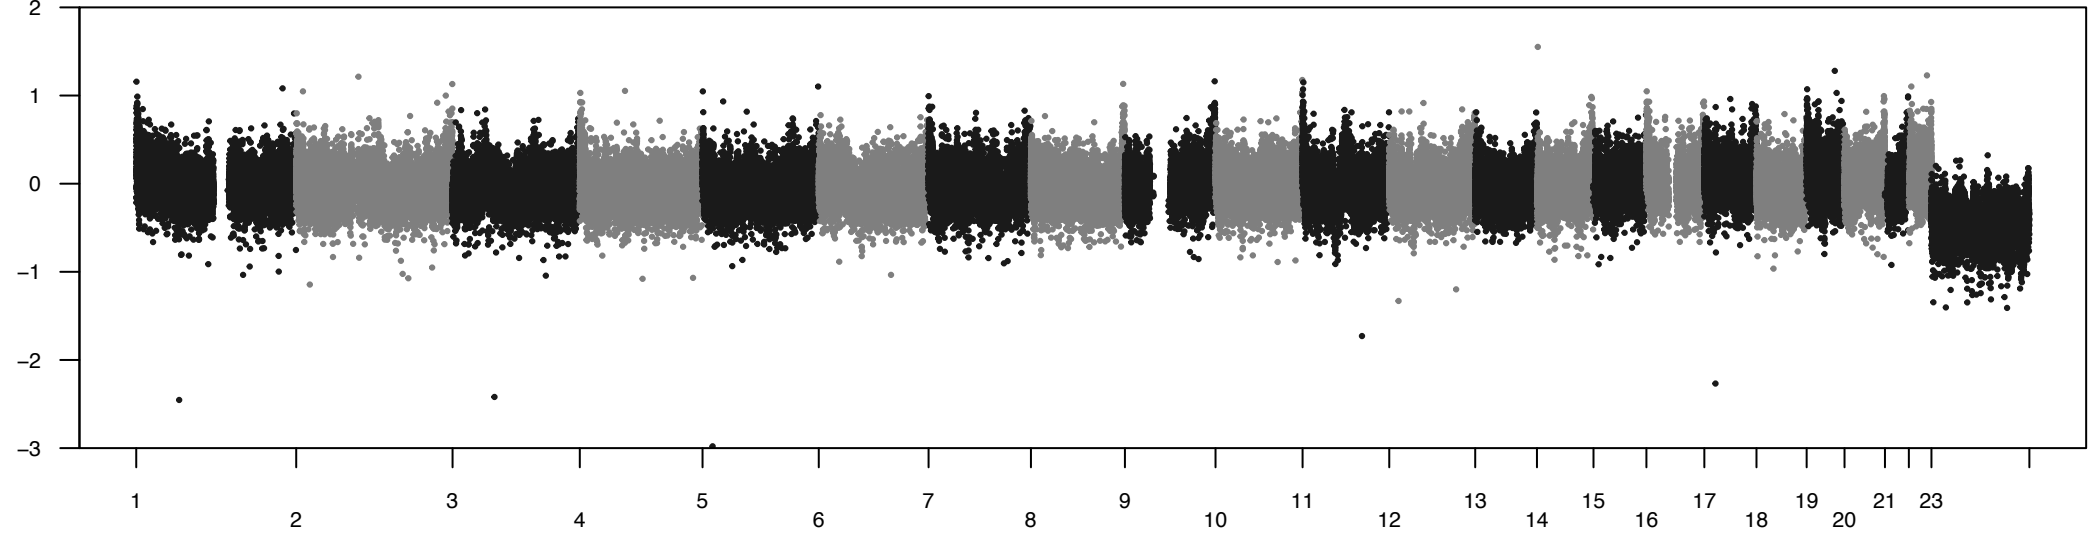

Chromosome

Supplemental Figure 4: Virtual karyotyping of a subset of DIAN iPSC. A-B. F15553. C-D. F16574. E-F. F12462. A, C, E. B Allele Frequency. B, D, F. Log R Ratio.
